# Supplementary material
Source: publisher site journal article supplement (https://www.dovepress.com/article/421418)
Supplement: Supplementary file 1 [file get_supplementary_file.php]

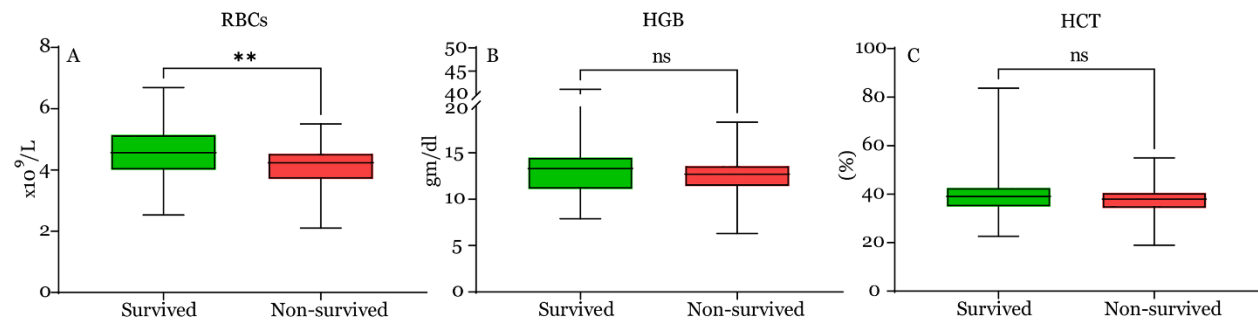

Figure S1: Red blood indices among COVID-19 survived and non-survived participants. RBCs: red blood cells; HGB: Hemoglobin; HCT: hematocrit. \*\*  $P < 0.001$ .

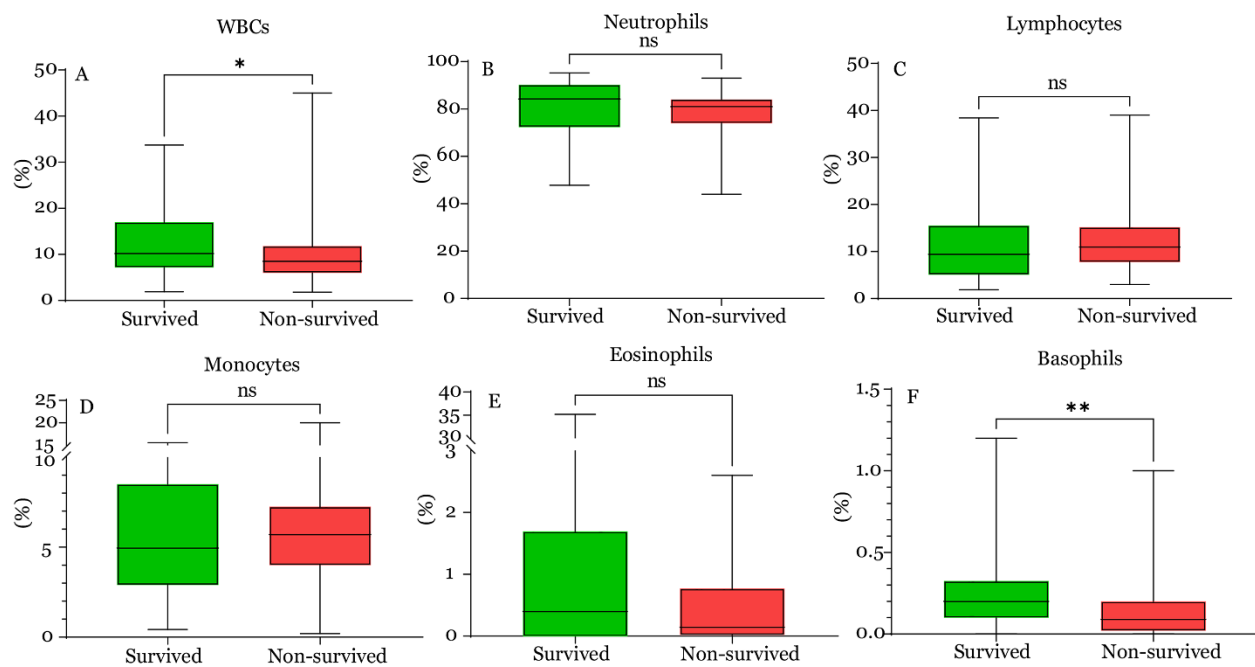

Figure S2: Leukocytes parameters among COVID-19 survived and non-survived participants. \*  $P < 0.05$ , \*\*  $P < 0.001$ .

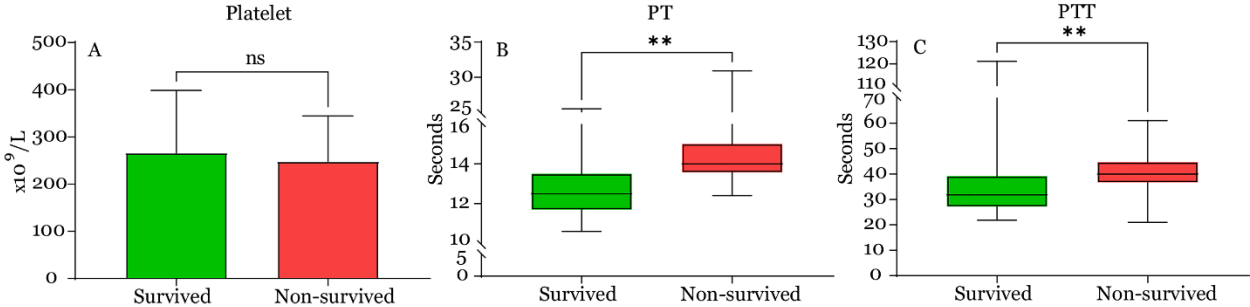

Figure S3: Coagulation profile of COVID-19 survived and non-survived participants. PT: prothrombin time, PTT: partial thromboplastin time (PTT). \*\*  $P < 0.001$ .
